# Supplementary material for: Machine learning modeling of patient health signals informs long-term survival on immune checkpoint inhibitor therapy
Source: PubMed Central journal article supplement — iScience. 2024 Aug 2;27(9):110634. doi: 10.1016/j.isci.2024.110634 (PMC11379673; doi:10.1016/j.isci.2024.110634), 2024-08-02

**iScience, Volume 27**

**Supplemental information**

**Machine learning modeling of patient  
health signals informs long-term survival  
on immune checkpoint inhibitor therapy**

**Gerald J. Sun, Gustavo Arango-Argoty, Gary J. Doherty, Damian E. Bikiel, Dejan Pavlovic, Allen C. Chen, Ross A. Stewart, Zhongwu Lai, and Etai Jacob**

**Table S3, related to STAR Methods:** Clinical trial cohorts used in the present study.

| <b>Trial name</b>     | <b>ClinicalTrials.gov ID</b> | <b>Phase</b> | <b><i>n</i> used in present study</b> | <b>Treatment arm</b>                                              | <b>Randomized</b> | <b>Blinded</b> | <b>Disease indication</b> |
|-----------------------|------------------------------|--------------|---------------------------------------|-------------------------------------------------------------------|-------------------|----------------|---------------------------|
| MYSTIC <sup>1</sup>   | NCT02453282                  | 3            | 1,092                                 | Durvalumab, durvalumab + tremelimumab, chemotherapy               | Y                 | N              | NSCLC                     |
| PACIFIC <sup>2</sup>  | NCT02125461                  | 3            | 709                                   | Durvalumab, placebo                                               | Y                 | Y              | NSCLC                     |
| ARCTIC <sup>3</sup>   | NCT02453282                  | 3            | 595                                   | Durvalumab, tremelimumab, durvalumab + tremelimumab, chemotherapy | Y                 | N              | NSCLC                     |
| ATLANTIC <sup>4</sup> | NCT02087423                  | 2            | 444                                   | Durvalumab                                                        | N                 | N              | NSCLC                     |
| CD1108 <sup>5</sup>   | NCT01693562                  | 1/2          | 690                                   | Durvalumab                                                        | N                 | N              | Solid tumors              |

N, no; NSCLC, non-small-cell lung cancer; Y, yes.

## Supplementary References

1. Rizvi, N.A., Cho, B.C., Reinmuth, N., Lee, K.H., Luft, A., Ahn, M.-J., van den Heuvel, M.M., Cobo, M., Vicente, D., Smolin, A., et al. (2020). Durvalumab With or Without Tremelimumab vs Standard Chemotherapy in First-line Treatment of Metastatic Non–Small Cell Lung Cancer: The MYSTIC Phase 3 Randomized Clinical Trial. *JAMA Oncology* 6, 661-674. [10.1001/jamaoncol.2020.0237](https://doi.org/10.1001/jamaoncol.2020.0237).
2. Antonia, S.J., Villegas, A., Daniel, D., Vicente, D., Murakami, S., Hui, R., Yokoi, T., Chiappori, A., Lee, K.H., de Wit, M., et al. (2017). Durvalumab after Chemoradiotherapy in Stage III Non–Small-Cell Lung Cancer. *New England Journal of Medicine* 377, 1919-1929. [10.1056/NEJMoa1709937](https://doi.org/10.1056/NEJMoa1709937).
3. Planchard, D., Reinmuth, N., Orlov, S., Fischer, J.R., Sugawara, S., Mandziuk, S., Marquez-Medina, D., Novello, S., Takeda, Y., Soo, R., et al. (2020). ARCTIC: durvalumab with or without tremelimumab as third-line or later treatment of metastatic non-small-cell lung cancer☆. *Annals of Oncology* 31, 609-618. <https://doi.org/10.1016/j.annonc.2020.02.006>.
4. Garassino, M.C., Cho, B.-C., Kim, J.-H., Mazières, J., Vansteenkiste, J., Lena, H., Corral Jaime, J., Gray, J.E., Powderly, J., Chouaid, C., et al. (2018). Durvalumab as third-line or later treatment for advanced non-small-cell lung cancer (ATLANTIC): an open-label, single-arm, phase 2 study. *The Lancet Oncology* 19, 521-536. [https://doi.org/10.1016/S1470-2045\(18\)30144-X](https://doi.org/10.1016/S1470-2045(18)30144-X).
5. Antonia, S.J., Balmanoukian, A., Brahmer, J., Ou, S.-H.I., Hellmann, M.D., Kim, S.-W., Ahn, M.-J., Kim, D.-W., Gutierrez, M., Liu, S.V., et al. (2019). Clinical Activity, Tolerability, and Long-Term Follow-Up of Durvalumab in Patients With Advanced NSCLC. *Journal of Thoracic Oncology* 14, 1794-1806. <https://doi.org/10.1016/j.jtho.2019.06.010>.

**Figure S1, related to Figure 1:** Comparison of trial-reported immune-related adverse events versus the machine learning adverse event signature in the context of different landmark analysis times. (A) Examination of trial-reported immune-related adverse events without controlling for guarantee-time bias. Point estimates and 95% confidence intervals for hazard ratios (Cox proportional hazards regression model) with machine learning adverse event signature class as the only covariate, computed per treatment arm, per trial, for overall survival. (B) Point estimates and 95% confidence intervals for hazard ratios (Cox proportional hazards regression model) with trial-reported irAE class as the only covariate, computed per treatment arm, per trial, after adverse event and overall survival data were landmarked at each of the days shown. (C) Point estimates and 95% confidence intervals for hazard ratios (Cox proportional hazards regression model) with machine learning adverse event signature class as the only covariate, computed per treatment arm, per trial, after adverse event and overall survival data were landmarked at each of the days shown. CI, confidence interval; HR, hazard ratio; irAE, immune-related adverse event; ML, machine learning.

**Figure S2, related to Figure 2:** Evaluation of AE signature in the context of progression-free survival or progressive disease. Point estimates and 95% confidence intervals for hazard ratios (Cox proportional hazards regression model) with machine learning adverse event signature class as the only covariate, computed per treatment arm, per trial, after data were landmarked at 60 days. (A) progression-free survival for patients with <1% PD-L1 tumor cells. (B) Progression-free survival in patients with >1% PD-L1 tumor cells. (C) Progression-free survival in all patients. (D) Overall survival in patients with progressive disease at their first RECIST evaluation. CI, confidence interval; HR, hazard ratio; ML, machine learning; NSCLC, non-small-cell lung cancer; PD, progressive disease; PFS, progression-free survival; OS, overall survival; RECIST, Response Evaluation Criteria in Solid Tumors; sig, ML AE signature.

**Figure S3, related to Figure 3:** Disease control rate (the proportion of patients with a best objective response that is complete response, partial response, or stable disease) for each combination of machine learning adverse event signature class and PD-L1 negative status (PD-L1<sup>-</sup> = PD-L1 <1%), for each trial. Raw numbers of patients are shown near datapoints. sig, ML AE signature.

Figure S1

A

Trial-reported irAE Overall Survival HR

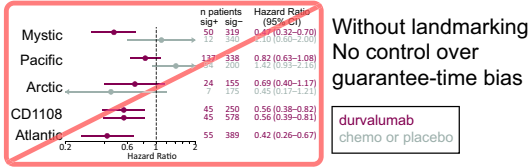

Without landmarking  
No control over  
guarantee-time bias

duvalumab  
chemo or placebo

B

Trial-reported irAE Overall Survival HR

Landmark

day

5

10

15

30

45

60

90

120

150

180

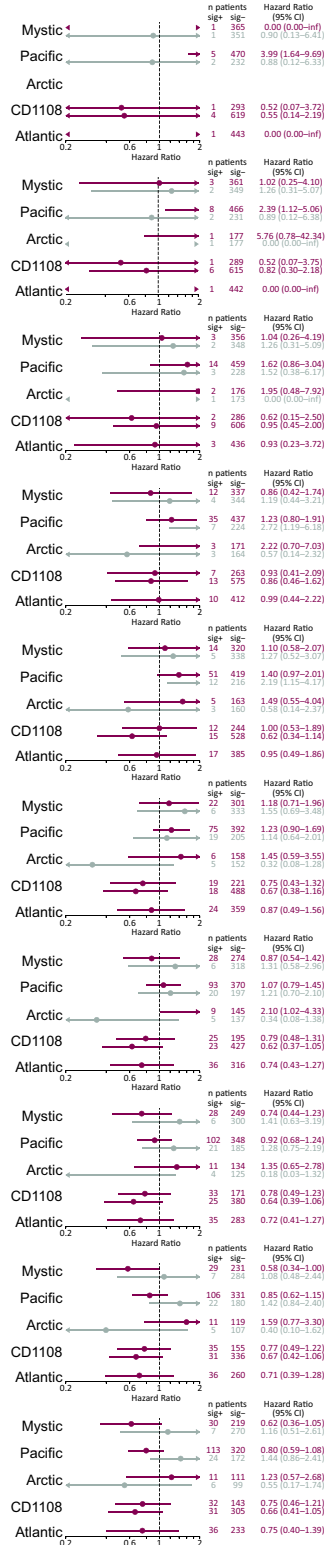

C

ML adverse event signature Overall survival HR

Landmark

day

5

10

15

30

45

60

90

120

150

180

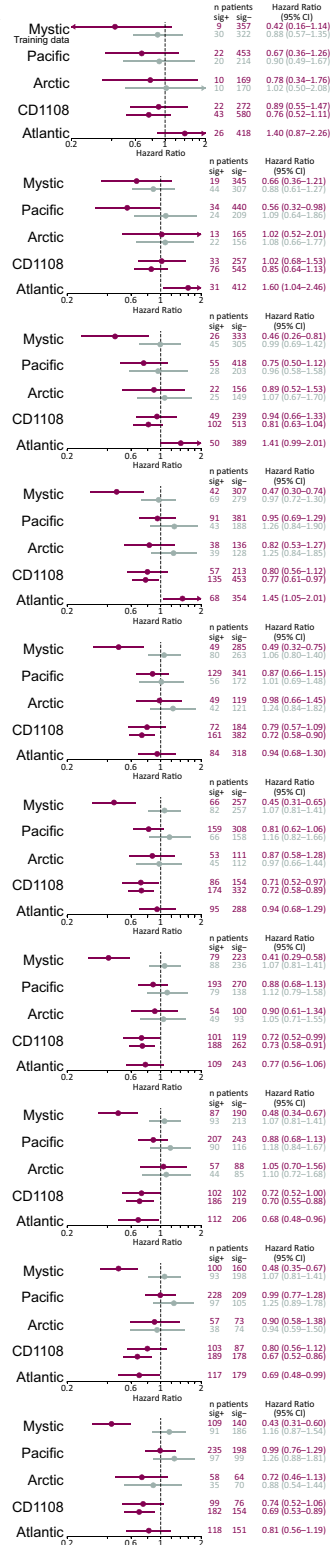

**Figure S2**

**A** ML adverse event signature  
60d landmark HR (PFS)

PDL1 < 1%

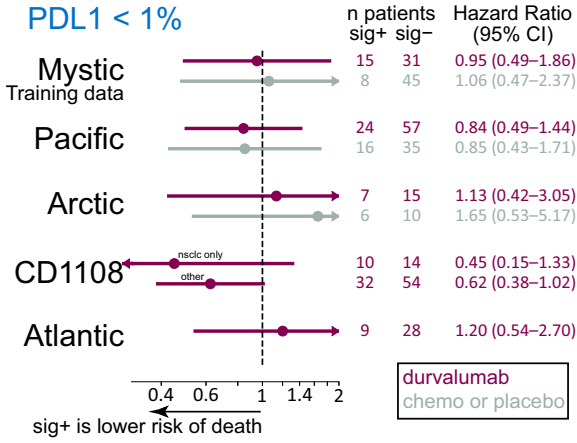

**B** ML adverse event signature  
60d landmark HR (PFS)

PDL1 ≥ 1%

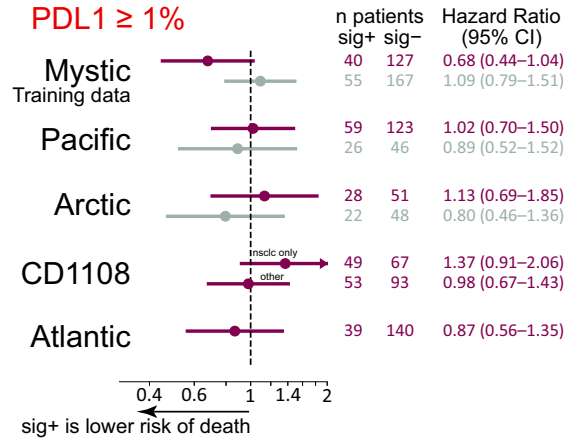

**C** ML adverse event signature  
60d landmark HR (PFS)

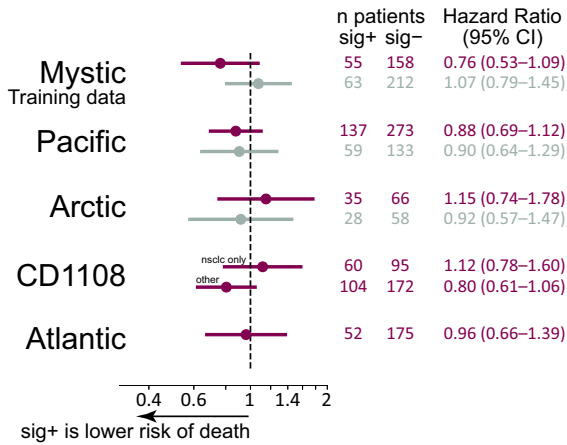

**D** ML adverse event signature  
First RECIST landmark HR (OS)

Progressive Disease

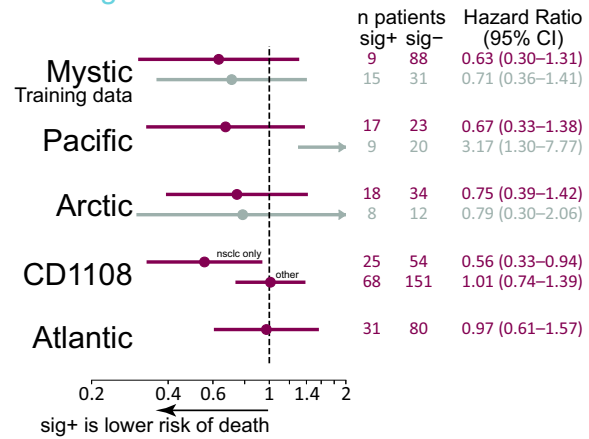

Figure S3

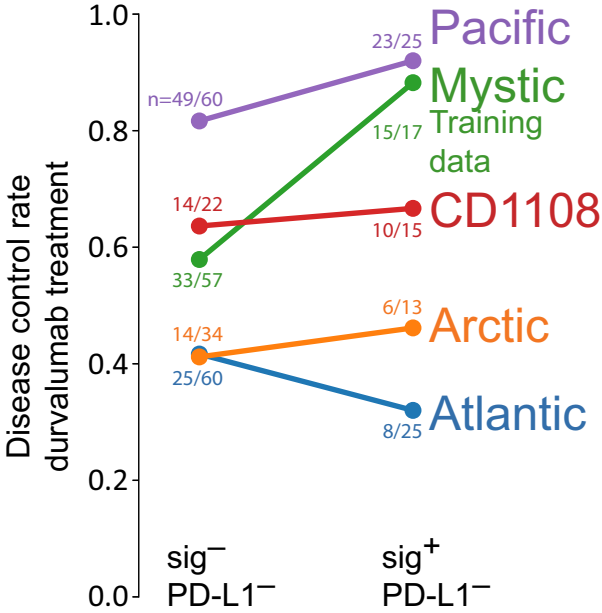

Supplement: mmc1.pdf [file mmc1.pdf]
